# Supplementary material
Source: Springer Nature journal article supplement (https://www.springermedizin.de/resource/supplementary/12957_2011_1072_MOESM3_ESM.pdf/9562192)

Circumferences.

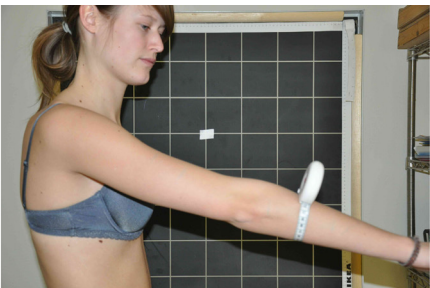

Abduction.

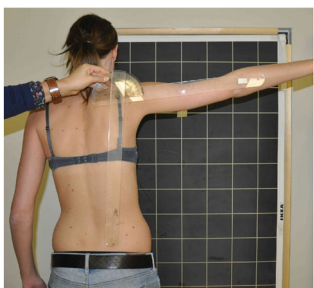

Retroflexion.

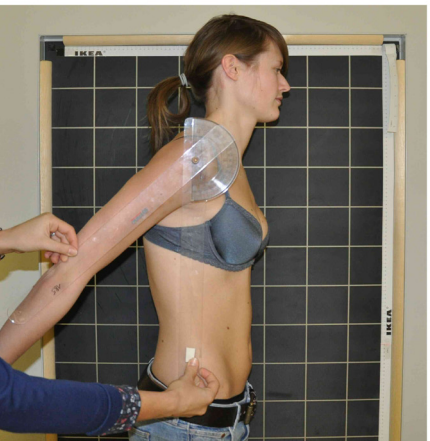

Anteflexion.

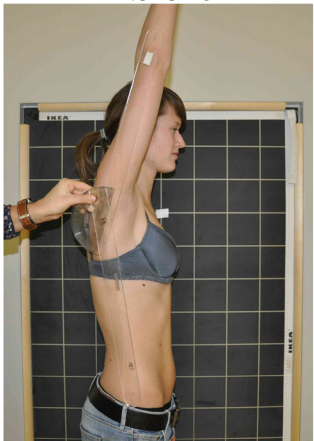

Endorotation.

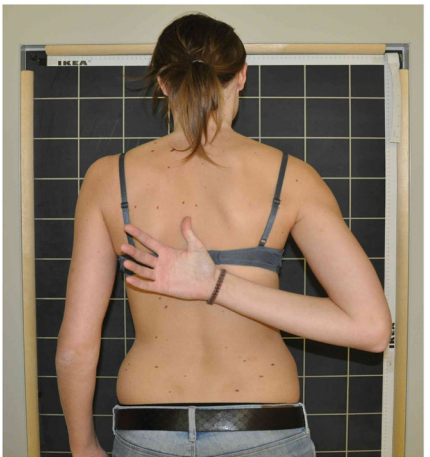

Scapular distance.

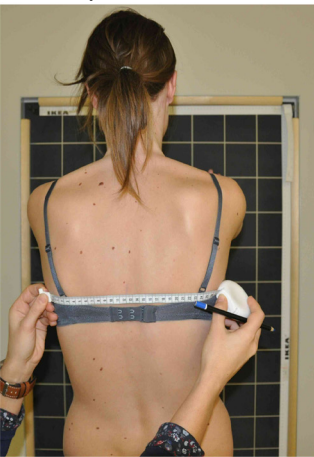

Supplement: MOESM3 [file 9562192]
